# Supplementary material
Source: MDPI journal article supplement (https://www.mdpi.com/2227-9717/11/4/1238)
Supplement: s1 [file s1]

## SUPPLEMENTARY MATERIAL

**Table S1.** ANOVA result of the antioxidant capacity first order model

| Source                            | Coefficient value | <i>p</i> -Value |
|-----------------------------------|-------------------|-----------------|
| <b>Model</b>                      |                   | 0.0671          |
| <b>Intercept</b>                  | 83.6808           | 0.0274          |
| <b>X<sub>1</sub></b>              | -0.519083         | 0.0878          |
| <b>X<sub>2</sub></b>              | -34.6633          | 0.1349          |
| <b>X<sub>1</sub>X<sub>2</sub></b> | 0.233333          | 0.2166          |

**Note:** X<sub>1</sub> = Inlet temperature (°C); X<sub>2</sub> = Maltodextrin:Habanero pepper extract ratio (w/w)

**Table S2.** ANOVA result of the antioxidant capacity second order model

| Source                            | Coefficient value | <i>p</i> -Value |
|-----------------------------------|-------------------|-----------------|
| <b>Model</b>                      |                   | 0.0000          |
| <b>Intercept</b>                  | 301.59            | 0.0000          |
| <b>X<sub>1</sub></b>              | -3.17846          | 0.0001          |
| <b>X<sub>2</sub></b>              | -133.013          | 0.0000          |
| <b>X<sub>1</sub><sup>2</sup></b>  | 0.0118935         | 0.0001          |
| <b>X<sub>2</sub><sup>2</sup></b>  | 32.3595           | 0.0000          |
| <b>X<sub>1</sub>X<sub>2</sub></b> | 0.23025           | 0.0960          |

**Note:** X<sub>1</sub> = Inlet temperature (°C); X<sub>2</sub> = Maltodextrin:Habanero pepper extract ratio (w/w)

**Table S3.** Results of the microencapsulated capsaicinoids of the complete experimental design for the optimization of the spray-drying conditions of a habanero pepper extract

| Exp       | Factors        |                |             |           | Variable response |               |              |
|-----------|----------------|----------------|-------------|-----------|-------------------|---------------|--------------|
|           | Coded Values   |                | Real values |           | CP*               | DC*           | TC*          |
|           | X <sub>1</sub> | X <sub>2</sub> | IT (°C)     | M:E (w/w) |                   |               |              |
| <b>1</b>  | -1             | -1             | 100         | 1:1       | 0.39 ± 0.000      | 0.035 ± 0.000 | 0.43 ± 0.000 |
| <b>2</b>  | 1              | -1             | 140         | 1:1       | 0.27 ± 0.000      | 0.025 ± 0.000 | 0.30 ± 0.000 |
| <b>3</b>  | -1             | 1              | 100         | 2:1       | 0.27 ± 0.004      | 0.027 ± 0.004 | 0.30 ± 0.000 |
| <b>4</b>  | 1              | 1              | 140         | 2:1       | 0.19 ± 0.007      | 0.022 ± 0.003 | 0.21 ± 0.003 |
| <b>5</b>  | 0              | 0              | 120         | 1.5:1     | 0.30 ± 0.004      | 0.030 ± 0.000 | 0.33 ± 0.004 |
| <b>6</b>  | 0              | 0              | 120         | 1.5:1     | 0.32 ± 0.000      | 0.030 ± 0.000 | 0.35 ± 0.000 |
| <b>7</b>  | 0              | 0              | 120         | 1.5:1     | 0.32 ± 0.007      | 0.030 ± 0.004 | 0.35 ± 0.004 |
| <b>8</b>  | 0              | 0              | 120         | 1.5:1     | 0.35 ± 0.000      | 0.030 ± 0.000 | 0.38 ± 0.000 |
| <b>9</b>  | -1.414         | 0              | 92          | 1.5:1     | 0.17 ± 0.000      | 0.060 ± 0.004 | 0.23 ± 0.004 |
| <b>10</b> | 1.414          | 0              | 148         | 1.5:1     | 0.16 ± 0.004      | 0.050 ± 0.000 | 0.22 ± 0.004 |
| <b>11</b> | 0              | -1.414         | 120         | 0.8:1     | 0.28 ± 0.000      | 0.080 ± 0.004 | 0.36 ± 0.004 |
| <b>12</b> | 0              | 1.414          | 120         | 2.2:1     | 0.12 ± 0.003      | 0.040 ± 0.003 | 0.16 ± 0.007 |

**Note:** Exp = Experiment; IT = Inlet Temperature; M:E = Ratio of maltodextrin gram per 1 gram of habanero pepper extract; w/w = Weight/weight ratio; CP = Capsaicinoid; DC = Dihydrocapsaicin; TC = Total capsaicinoids; \*mg/g Powder; Values are means  $\pm$  SD (n = 3)

**Table S4.** Model for capsaicin and total capsaicinoids as a function input variables and analysis of variance

| Source                            | CP           | TC           | CP<br>( <i>p</i> -value) | TC<br>( <i>p</i> -value) |
|-----------------------------------|--------------|--------------|--------------------------|--------------------------|
| <b>Model</b>                      |              |              | 0.0000                   | 0.0000                   |
| <b>Intercept</b>                  | -1.43601     | -1.15088     |                          |                          |
| <b>X<sub>1</sub></b>              | 0.0292452    | 0.0265272    | 0.0108                   | 0.0019                   |
| <b>X<sub>2</sub></b>              | 0.219263     | 0.119397     | 0.0000                   | 0.0000                   |
| <b>X<sub>1</sub><sup>2</sup></b>  | -0.000132814 | -0.000122189 | 0.0001                   | 0.0000                   |
| <b>X<sub>2</sub><sup>2</sup></b>  | -0.142499    | -0.117499    | 0.0038                   | 0.0037                   |
| <b>X<sub>1</sub>X<sub>2</sub></b> | 0.142499     | 0.000916667  | 0.5662                   | 0.4441                   |

**Note:** X<sub>1</sub> = Inlet temperature (°C); X<sub>2</sub> = Maltodextrin:Habanero pepper extract ratio (w/w); CP = Capsaicin; TC = Total capsaicinoids

**Table S5.** Results of the validation experiment for the microencapsulated polyphenol profile and their comparison with the predicted values of the mathematical model

| Metabolite          | Spray drying conditions |              | Optimal response<br>(mg/100g PW) | Experimental Value<br>(mg/100g PW) | Error<br>(%) |
|---------------------|-------------------------|--------------|----------------------------------|------------------------------------|--------------|
|                     | IT<br>(°C)              | M:E<br>(w/w) |                                  |                                    |              |
| TPC                 | 0.8                     | 148          | 8.42*                            | 6.56 $\pm$ 0.12*                   | 22.09        |
| Protocatechuic acid | 0.8                     | 148          | 19.46                            | 0 $\pm$ 0.00                       | 100          |
| Coumaric acid       | 0.8                     | 148          | 2.09                             | 2.27 $\pm$ 0.10                    | 8.61         |
| Rutin               | 0.8                     | 148          | 7.08                             | 4.1 $\pm$ 0.02                     | 42.09        |
| Diosmetin           | 0.8                     | 148          | 1.74                             | 0.65 $\pm$ 0.01                    | 62.64        |
| Naringenin          | 0.8                     | 148          | 0.98                             | 0.40 $\pm$ 0.00                    | 59.18        |

**Note:** TPC = Total polyphenol content; IT = Inlet temperature; M:E = Maltodextrin ratio per gram of extract; w/w = Weight/Weight; PW = Powder; \*mg Gallic acid equivalent/100g powder; Values are means  $\pm$  SD (n = 3)

**Table S6.** Results of the validation experiment for capsaicin and total capsaicinoids content and their comparison with the predicted values of the mathematical model

| Response variable | Experimental*            | Predicted*    | Error rate<br>(%) |
|-------------------|--------------------------|---------------|-------------------|
| CP                | 0.12 $\pm$ 0.00 mg /g PW | 0.17 mg /g PW | 29.41             |
| TC                | 0.16 $\pm$ 0.00 mg /g PW | 0.23 mg /g PW | 30.43             |

**Note:** CP = Capsaicin; TC = Total Capsaicinoids; PW = Powder; Values are means  $\pm$  SD (n = 3); \*Microencapsulation condition 148°C inlet temperature and 0.8:1 w/w ratio (Maltodextrin:Habanero pepper extract)

**Table S7.** Polyphenol profile of the habanero pepper (*Capsicum chinense* Jacq.) extract and microencapsulated by spray drying

| Spray drying conditions |         |           | Metabolites (mg/100g Powder) |                            |                           |                            |                            |                            |                            |
|-------------------------|---------|-----------|------------------------------|----------------------------|---------------------------|----------------------------|----------------------------|----------------------------|----------------------------|
| Exp                     | IT (°C) | M:E (w/w) | Gallic acid                  | Protocatechuic acid        | Catechin                  | Chlorogenic acid           | Coumaric acid              | Cinnamic acid              | Rutin                      |
| 1                       | 100     | 1         | 3.60 ± 0.05                  | 17.34 ± 0.18 <sup>f</sup>  | 5.96 ± 0.17 <sup>c</sup>  | 5.99 ± 0.15 <sup>abc</sup> | 1.78 ± 0.03 <sup>e</sup>   | 1.20 ± 0.01 <sup>cd</sup>  | 10.77 ± 0.42 <sup>h</sup>  |
| 2                       | 140     | 1         | 3.78 ± 0.05 <sup>abc</sup>   | 10.26 ± 0.48 <sup>de</sup> | 3.42 ± 0.75 <sup>b</sup>  | 1.46 ± 0.51 <sup>a</sup>   | 1.13 ± 0.19 <sup>cd</sup>  | 0.98 ± 0.14 <sup>ab</sup>  | 2.85 ± 0.23 <sup>bcd</sup> |
| 3                       | 100     | 2         | 3.47 ± 0.43 <sup>ab</sup>    | 11.05 ± 0.36 <sup>e</sup>  | 4.19 ± 0.04 <sup>b</sup>  | 0.90 ± 0.01 <sup>a</sup>   | 1.33 ± 0.01 <sup>d</sup>   | 0.90 ± 0.00 <sup>a</sup>   | 3.03 ± 0.09 <sup>cde</sup> |
| 4                       | 140     | 2         | 2.43 ± 0.18 <sup>a</sup>     | 6.81 ± 0.33 <sup>bc</sup>  | 1.96 ± 0.54 <sup>a</sup>  | 1.38 ± 0.51 <sup>a</sup>   | 1.00 ± 0.09 <sup>bc</sup>  | 1.06 ± 0.09 <sup>abc</sup> | 1.71 ± 0.19 <sup>ab</sup>  |
| 5                       | 120     | 1.5       | 0.00                         | 8.63 ± 0.00 <sup>cd</sup>  | 7.09 ± 0.08 <sup>d</sup>  | 4.27 ± 0.01 <sup>ab</sup>  | 0.83 ± 0.00 <sup>ab</sup>  | 1.23 ± 0.01 <sup>cd</sup>  | 1.62 ± 0.02 <sup>ab</sup>  |
| 6                       | 120     | 1.5       | 2.33 ± 0.01 <sup>a</sup>     | 8.87 ± 0.01 <sup>cde</sup> | 7.24 ± 0.15 <sup>d</sup>  | 4.06 ± 0.06 <sup>ab</sup>  | 0.74 ± 0.11 <sup>a</sup>   | 1.16 ± 0.13 <sup>bcd</sup> | 1.25 ± 0.24 <sup>a</sup>   |
| 7                       | 120     | 1.5       | 2.10 ± 0.00 <sup>a</sup>     | 8.14 ± 0.26 <sup>cd</sup>  | 6.70 ± 0.01 <sup>cd</sup> | 3.77 ± 0.09 <sup>ab</sup>  | 0.76 ± 0.01 <sup>a</sup>   | 1.16 ± 0.01 <sup>bcd</sup> | 1.90 ± 0.66 <sup>abc</sup> |
| 8                       | 120     | 1.5       | 2.52 ± 0.02 <sup>a</sup>     | 8.82 ± 0.03 <sup>cde</sup> | 7.42 ± 0.17 <sup>d</sup>  | 4.14 ± 0.17 <sup>ab</sup>  | 0.86 ± 0.02 <sup>ab</sup>  | 1.83 ± 0.02 <sup>f</sup>   | 2.78 ± 1.01 <sup>bcd</sup> |
| 9                       | 92      | 1.5       | 5.03 ± 2.13 <sup>bc</sup>    | 4.61 ± 2.39 <sup>b</sup>   | 3.40 ± 0.07 <sup>b</sup>  | 13.24 ± 0.16 <sup>c</sup>  | 1.30 ± 0.04 <sup>d</sup>   | 1.68 ± 0.10 <sup>e</sup>   | 7.15 ± 0.38 <sup>g</sup>   |
| 10                      | 148     | 1.5       | 8.28 ± 0.80 <sup>d</sup>     | 4.91 ± 0.50 <sup>b</sup>   | 13.60 ± 0.35 <sup>f</sup> | 13.79 ± 0.21 <sup>c</sup>  | 1.23 ± 0.03 <sup>d</sup>   | 1.32 ± 0.05 <sup>e</sup>   | 4.94 ± 0.44 <sup>f</sup>   |
| 11                      | 120     | 0.8       | 10.39 ± 0.01 <sup>e</sup>    | 31.65 ± 0.03 <sup>g</sup>  | 7.42 ± 0.09 <sup>d</sup>  | 24.38 ± 0.42 <sup>d</sup>  | 2.24 ± 0.00 <sup>f</sup>   | 2.50 ± 0.01 <sup>d</sup>   | 10.61 ± 0.46 <sup>h</sup>  |
| 12                      | 120     | 2.2       | 5.57 ± 0.04 <sup>c</sup>     | 2.29 ± 0.38 <sup>a</sup>   | 9.83 ± 0.13 <sup>e</sup>  | 10.32 ± 0.10 <sup>bc</sup> | 0.92 ± 0.01 <sup>abc</sup> | 1.04 ± 0.01 <sup>abc</sup> | 3.99 ± 0.18 <sup>def</sup> |
| 13*                     | 148     | 0.8       | 0.00                         | 0.00                       | 9.11 ± 0.40 <sup>e</sup>  | 42.67 ± 9.63 <sup>e</sup>  | 2.27 ± 0.10 <sup>f</sup>   | 2.61 ± 0.01 <sup>f</sup>   | 4.1 ± 0.02 <sup>ef</sup>   |
| Extract**               | -       | -         | 47.15 ± 0.21                 | 102.67 ± 0.27              | 113.30 ± 0.08             | 186.71 ± 1.75              | 7.81 ± 0.10                | 25.25 ± 0.41               | 53.01 ± 0.27               |

**Note:** Exp = Experiment; IT = Inlet Temperature; M:E = Ratio of maltodextrin per gram of habanero pepper extract; w/w = Weight/weight ratio; \* Validation experiment; \*\*mg/100g dry matter; Different letters in the same column refer to a statistically significant difference (LSD, p<0.05)

**Table S7.** Polyphenol profile of the habanero pepper (*Capsicum chinense* Jacq.) extract and microencapsulated by spray drying (Continue)

| Exp       | Metabolites<br>(mg/100g powder) |                             |                           |                           |                           |                            |                           |                           |                           |
|-----------|---------------------------------|-----------------------------|---------------------------|---------------------------|---------------------------|----------------------------|---------------------------|---------------------------|---------------------------|
|           | Quercetin +<br>Luteolin         | Kaempferol                  | Vanillin                  | Naringenin                | Apigenin                  | Diosmetin                  | Vanillic acid             | Ferulic acid              | Ellagic acid              |
| 1         | 0.33 ± 0.003 <sup>ab</sup>      | 1.67 ± 0.18 <sup>g</sup>    | 1.93 ± 0.004 <sup>f</sup> | 0.00                      | 1.06 ± 0.004 <sup>c</sup> | 0.88 ± 0.27 <sup>e</sup>   | 0.29 ± 0.01 <sup>a</sup>  | 0.32 ± 0.00 <sup>b</sup>  | 1.78 ± 0.09 <sup>e</sup>  |
| 2         | 0.58 ± 0.003 <sup>cd</sup>      | 0.77 ± 0.03 <sup>abcd</sup> | 0.31 ± 0.0 <sup>b</sup>   | 0.47 ± 0.00 <sup>f</sup>  | 1.08 ± 0.00 <sup>d</sup>  | 0.98 ± 0.11 <sup>de</sup>  | 0.27 ± 0.004 <sup>a</sup> | 0.33 ± 0.13 <sup>b</sup>  | 1.04 ± 0.20 <sup>cd</sup> |
| 3         | 0.56 ± 0.001 <sup>cd</sup>      | 1.42 ± 0.29 <sup>fg</sup>   | 0.30 ± 0.02 <sup>b</sup>  | 0.42 ± 0.002 <sup>c</sup> | 0.32 ± 0.007 <sup>a</sup> | 0.82 ± 0.14 <sup>cde</sup> | 0.22 ± 0.004 <sup>a</sup> | 0.31 ± 0.002 <sup>b</sup> | 1.20 ± 0.20 <sup>d</sup>  |
| 4         | 0.42 ± 0.000 <sup>abc</sup>     | 1.14 ± 0.00 <sup>ef</sup>   | 0.21 ± 0.00 <sup>a</sup>  | 0.41 ± 0.03 <sup>b</sup>  | 0.00                      | 0.00                       | 0.38 ± 0.00 <sup>a</sup>  | 0.33 ± 0.002 <sup>b</sup> | 0.87 ± 0.02 <sup>cd</sup> |
| 5         | 0.66 ± 0.050 <sup>d</sup>       | 1.08 ± 0.16 <sup>de</sup>   | 0.33 ± 0.02 <sup>b</sup>  | 0.00                      | 0.00                      | 0.00                       | 3.71 ± 0.42 <sup>d</sup>  | 0.47 ± 0.13 <sup>c</sup>  | 0.82 ± 0.05 <sup>c</sup>  |
| 6         | 0.51 ± 0.040 <sup>bcd</sup>     | 0.85 ± 0.01 <sup>cde</sup>  | 0.33 ± 0.00 <sup>b</sup>  | 0.00                      | 0.00                      | 0.00                       | 3.89 ± 0.51 <sup>d</sup>  | 0.35 ± 0.001 <sup>b</sup> | 0.46 ± 0.03 <sup>b</sup>  |
| 7         | 0.58 ± 0.004 <sup>cd</sup>      | 0.93 ± 0.02 <sup>cde</sup>  | 0.30 ± 0.03 <sup>b</sup>  | 0.00                      | 0.00                      | 0.00                       | 3.56 ± 0.38 <sup>d</sup>  | 0.05 ± 0.009              | 0.27 ± 0.02 <sup>ab</sup> |
| 8         | 0.52 ± 0.030 <sup>bcd</sup>     | 3.14 ± 0.11 <sup>abc</sup>  | 0.34 ± 0.00 <sup>b</sup>  | 0.00                      | 0.00                      | 0.00                       | 3.58 ± 0.02 <sup>d</sup>  | 0.14 ± 0.002 <sup>a</sup> | 0.33 ± 0.14 <sup>b</sup>  |
| 9         | 0.69 ± 0.080 <sup>d</sup>       | 0.48 ± 0.01 <sup>a</sup>    | 0.41 ± 0.04 <sup>c</sup>  | 0.00                      | 0.00                      | 0.54 ± 0.002 <sup>a</sup>  | 1.58 ± 0.01 <sup>b</sup>  | 0.00                      | 0.00                      |
| 10        | 0.25 ± 0.120 <sup>a</sup>       | 0.49 ± 0.01 <sup>ab</sup>   | 0.43 ± 0.00 <sup>c</sup>  | 0.40 ± 0.001 <sup>a</sup> | 0.00                      | 0.56 ± 0.00 <sup>ab</sup>  | 3.94 ± 0.06 <sup>d</sup>  | 0.12 ± 0.16 <sup>a</sup>  | 0.16 ± 0.01 <sup>ab</sup> |
| 11        | 0.72 ± 0.004 <sup>d</sup>       | 0.70 ± 0.05 <sup>abc</sup>  | 0.70 ± 0.03 <sup>d</sup>  | 0.43 ± 0.002 <sup>d</sup> | 0.00                      | 0.69 ± 0.01 <sup>bcd</sup> | 1.30 ± 0.27 <sup>b</sup>  | 0.90 ± 0.60 <sup>d</sup>  | 1.02 ± 0.11 <sup>cd</sup> |
| 12        | 0.29 ± 0.190 <sup>a</sup>       | 0.49 ± 0.005 <sup>a</sup>   | 0.34 ± 0.02 <sup>b</sup>  | 0.00                      | 0.41 ± 0.004 <sup>b</sup> | 0.52 ± 0.004 <sup>a</sup>  | 2.61 ± 0.03 <sup>c</sup>  | 0.00                      | 0.00                      |
| 13*       | 1.56 ± 0.010 <sup>e</sup>       | 0.81 ± 0.01 <sup>bcd</sup>  | 1.24 ± 0.03 <sup>e</sup>  | 0.40 ± 0.00 <sup>a</sup>  | 0.00                      | 0.65 ± 0.01 <sup>bcd</sup> | 0.00                      | 0.00                      | 2.49 ± 0.02 <sup>e</sup>  |
| Extract** | 14.59 ± 0.00                    | 13.99 ± 0.73                | 25.25 ± 0.41              | 8.06 ± 0.03               | 4.23 ± 0.05               | 12.56 ± 0.31               | 61.93 ± 0.42              | 6.62 ± 0.21               | 11.19 ± 0.26              |

**Note:** Exp = Experiment; \*Validation experiment; \*\*mg/100g dry matter; Different letters in the same column refer to a statistically significant difference (LSD, p<0.05)

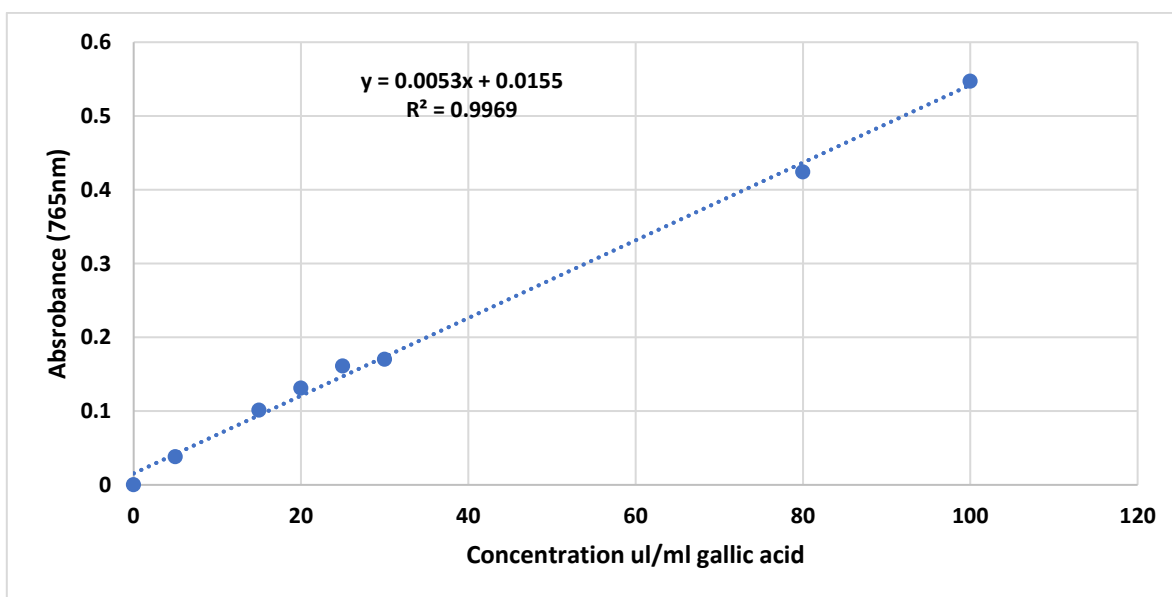

**Figure S1.** Calibration curve for the determination of the total polyphenol content by the Folin-Ciocalteu methodology

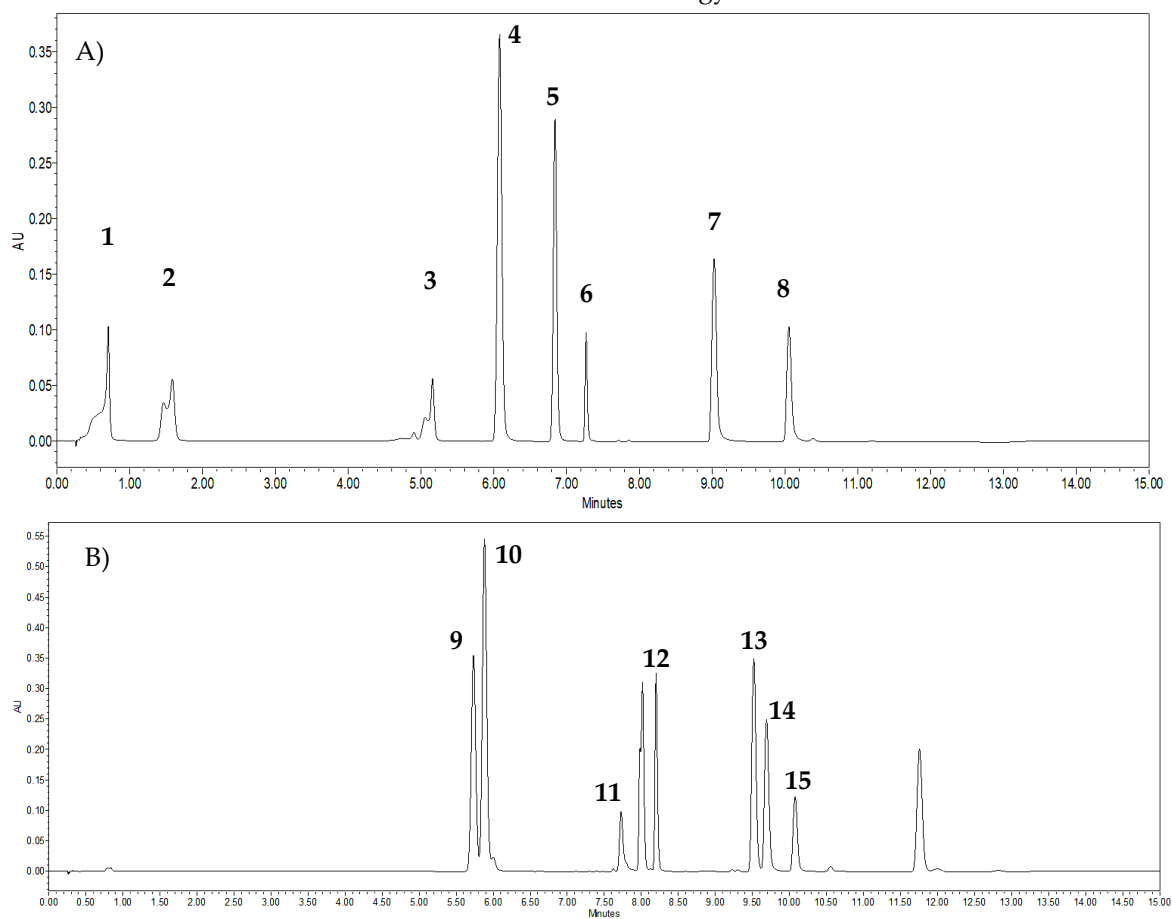

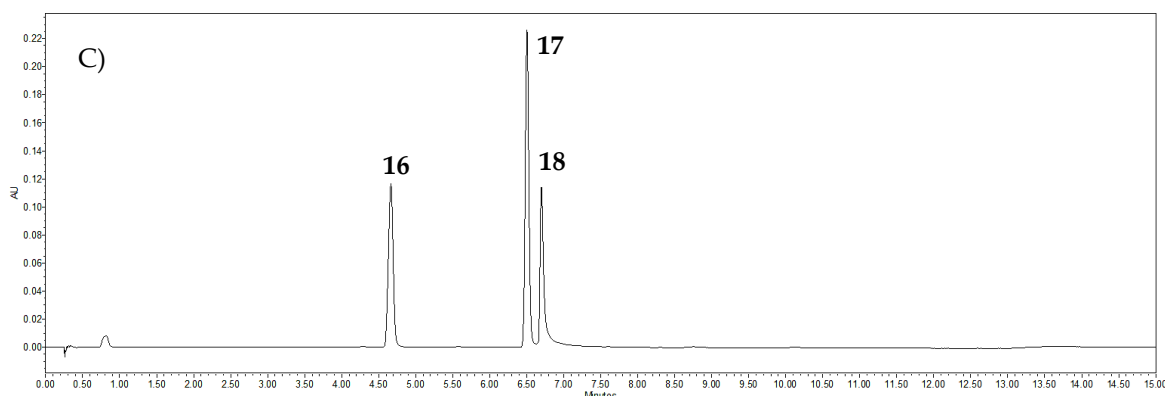

**Figure S2.** Chromatograms of the polyphenol profile obtained by ultra-high pressure liquid chromatography (UPLC); A) 1. Gallic acid, 2. Protocatechuic acid, 3. Catechin, 4. Chlorogenic acid, 5. Cinnamic acid, 6. Rutin, 7. Quercetin + luteolin, 8. Kaempferol; B) 9. Vanillin, 10. Coumaric acid, 11. Ferulic acid, 12. Ellagic acid, 13. Naringenin, 14. Apigenin, 15. Diosmetin; C) 16. Vanillic Acid, 17. Diosmin + hesperidin, 18. Neohesperidin

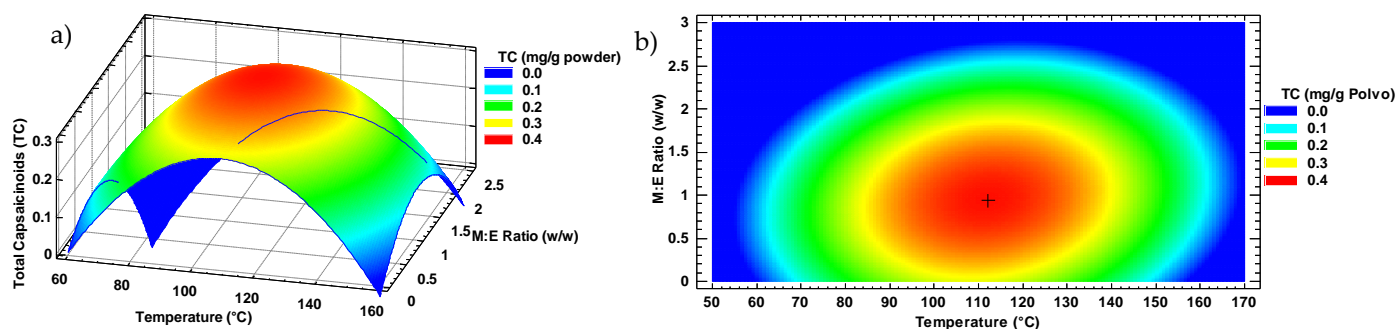

**Figure S3.** Total capsaicinoids content response surface (a) and contour plot (b) by factors of input inlet temperature and maltodextrin ratio
